# Supplementary material for: Influence of the Rearing Host on Biological Parameters of Trichopria drosophilae, a Potential Biological Control Agent of Drosophila suzukii
Source: Insects. 2019 Jun 25;10(6):183. doi: 10.3390/insects10060183 (PMC6628421; doi:10.3390/insects10060183)
Supplement: Supplementary file 1 [file insects-10-00183-s001.xlsx]

## Sheet: Table1
		DM-DM				DM-DS				DM-DI				DS-DM				DS-DS				DS-DI
		flies	♂ P	♀ P	all P	flies	♂ P	♀ P	all P	flies	♂ P	♀ P	all P	flies	♂ P	♀ P	all P	flies	♂ P	♀ P	all P	flies	♂ P	♀ P	all P
no-choice	mean	9.08	7.52	20.8	28.32	5.52174	6.69565	21.7391	28.4348	6.52381	6.57143	16.0476	22.619	6.48	8.76	22.76	31.52	4.12	6.8	24.88	31.68	6.85714	7.85714	16	23.8571
	n	25	25	25	25	23	23	23	23	21	21	21	21	25	25	25	25	25	25	25	25	21	21	21	21
	SE	0.816333	0.702662	0.752773	0.815925	0.673817	0.538754	1.14591	1.09585	0.809524	0.955115	1.14948	1.10513	0.712086	0.735482	0.988737	0.914913	0.463033	0.67082	0.527004	0.52192	0.8289	1.08295	1.34872	1.45125
weight (mg)	mean			0.12122				0.14944				0.18994				0.12766				0.15348				0.18636
	n			50				50				50				50				50				50
	SE			0.00188902				0.00295492				0.00411016				0.00244692				0.00258808				0.00325398
choice	mean	25.1667	4.33333	5.88889	10.3889	15.7778	5.38889	13.0556	18.4444	15.7222	3.05556	5.11111	8.16667	32.1053	2.78947	3.05263	5.84211	10.7895	6.15789	18.0526	24.2105	16.1053	2.68421	4.73684	7.42105
	n	18	18	18	18	18	18	18	18	18	18	18	18	19	19	19	19	19	19	19	19	19	19	19	19
	SE	0.854364	0.376796	0.537994	0.750057	1.12369	0.712061	1.04666	1.24033	0.830757	0.32841	0.65682	0.690545	0.867686	0.479952	0.455643	0.70323	1.3574	0.711065	1.40137	1.44057	0.765947	0.471061	0.487188	0.578065
control*	mean	37.8				33.32				33.52
	n	25				25				25
	SE	0.382971				0.725075				0.950649
weight* (mg)	mean	1.09856				1.44712				2.21704
	n	50				50				50
	SE	0.0251251				0.0404585				0.063626
*strain does not apply
